# Supplementary material
Source: ML conference proceedings conference paper supplement (https://openaccess.thecvf.com/content/ACCV2024/html/Gupta_Conditional_Distribution_Modelling_ACCV_2024_paper.html)
Supplement: Supplementary file 1 [file Gupta_Conditional_Distribution_Modelling_ACCV_2024_supplemental.pdf]

## Supplementary for Conditional Distribution Modelling for Few-Shot Image Synthesis with Diffusion Models

For further visual analysis, here, in Figure 1, we show comparison of CDM with LoFGAN on the AnimalFaces dataset in 3-shot setting, where CDM samples clearly have better sample quality and diversity.

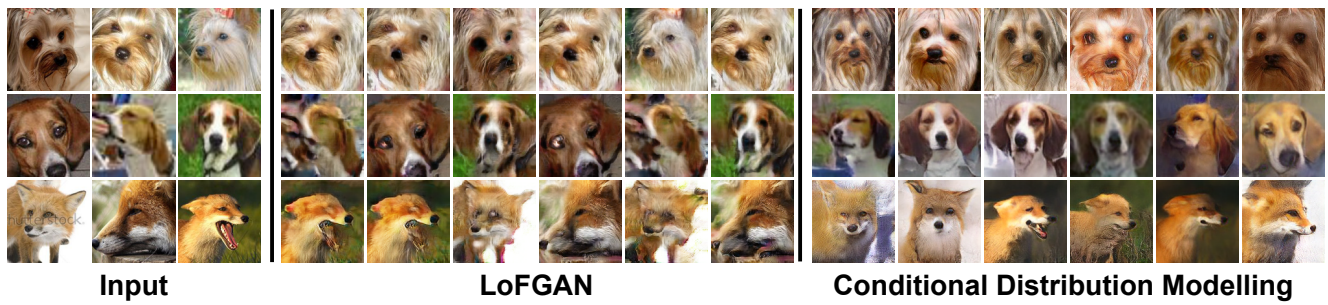

Figure 1. Comparison of LSO with LoFGAN in 3-shot setting on AnimalFaces dataset.
